# Supplementary material for: Alone or Abused? Fear of Being Single, Attachment Insecurity, and IPV Risk in Young Adults
Source: Research Square preprint supplement (doi:10.21203/rs.3.rs-7769552/v1), 2025-12-10
Supplement: Supplementary file 1 [file 6a69ef35e05278a4cfe1469a.docx]

**Table 1. Hierarchical Regression Model Statistics.**

| **Predictor** | **B** | **SE B** | **β** | **t** | **p** |
| --- | --- | --- | --- | --- | --- |
| **Step 1** |  |  |  |  |  |
| Attachment Anxiety | 2.57 | 0.14 | .58 | 18.55 | < .001 |
| Attachment Avoidance | 0.34 | 0.19 | .05 | 1.77 | .078 |
| **R²=.36**, ΔR²=.36, *F*(2, 684)=193.93, *p*<.001 |  |  |  |  |  |
| **Step 2** |  |  |  |  |  |
| Attachment Anxiety | 2.32 | 0.15 | .53 | 15.75 | < .001 |
| Attachment Avoidance | 0.50 | 0.23 | .08 | 2.13 | .033 |
| Relationship-Contingent Self-Esteem | 0.40 | 0.27 | .05 | 1.51 | .133 |
| Preference for a Dominant Partner | 0.17 | 0.06 | .09 | 2.66 | .008 |
| **R²=.37**, ΔR²=.009, *F* change (2, 682)=4.84, *p*=.008 | | |  |  |  |
| **Step 3** |  |  |  |  |  |
| Attachment Anxiety | 2.29 | 0.15 | .53 | 15.50 | < .001 |
| Attachment Avoidance | 0.46 | 0.23 | .07 | 1.99 | .048 |
| Relationship-Contingent Self-Esteem | 0.38 | 0.26 | .05 | 1.48 | .142 |
| Preference for a Dominant Partner | 0.17 | 0.06 | .09 | 2.76 | .006 |
| Frequency of Abuse Experienced | 0.29 | 0.15 | .07 | 1.92 | .055 |
| Participant Aggression | –0.51 | 0.19 | –.11 | –2.63 | .009 |
| **R²=.38**, ΔR²=.006, *F* change (2, 680)=3.49, *p*=.031 | | |  |  |  |

***Note.*** *N=687. B=unstandardized regression coefficient, SE B=standard error of B, β=standardized beta coefficient.*
